# Supplementary material for: Response of acid mobilization of iron-containing mineral dust to improvement of air quality projected in the future
Source: Copernicus journal article supplement (doi:10.5194/acp-14-3441-2014), 2014-04-07
Supplement: Supplementary file 1 [file acp-14-3441-2014-supplement.pdf]

(a) SO<sub>2</sub> emission from fossil fuel combustion

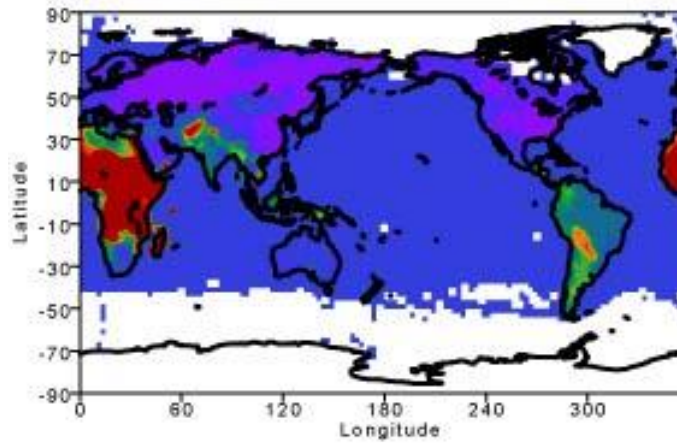

(b) NO<sub>2</sub> emission

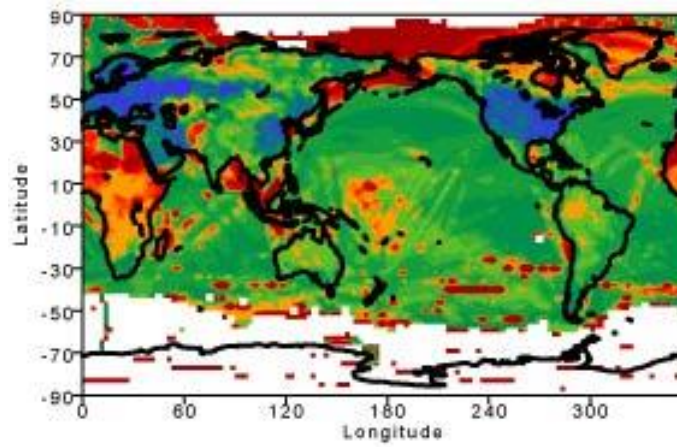

(c) NH<sub>3</sub> emission

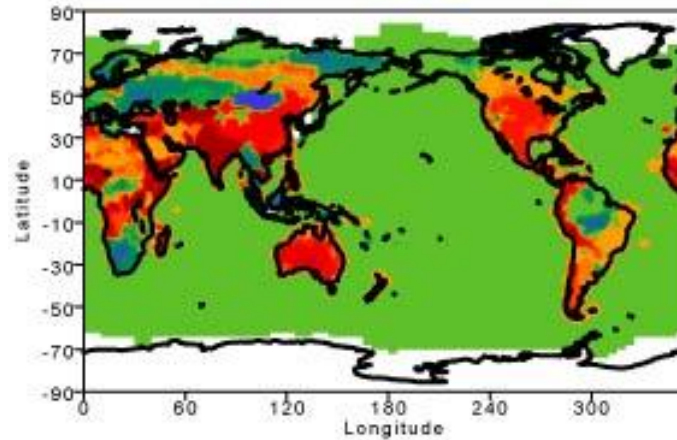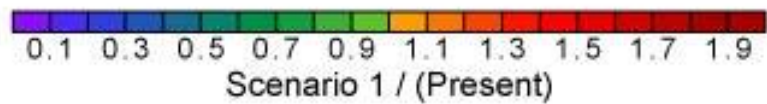

Figure S1. Ratios of (a) emission from fossil fuel combustion in 2100 to 2000 for SO<sub>2</sub>, (b) total emission in 2100 to 2000 for NO<sub>2</sub>, and (c) that for NH<sub>3</sub>.

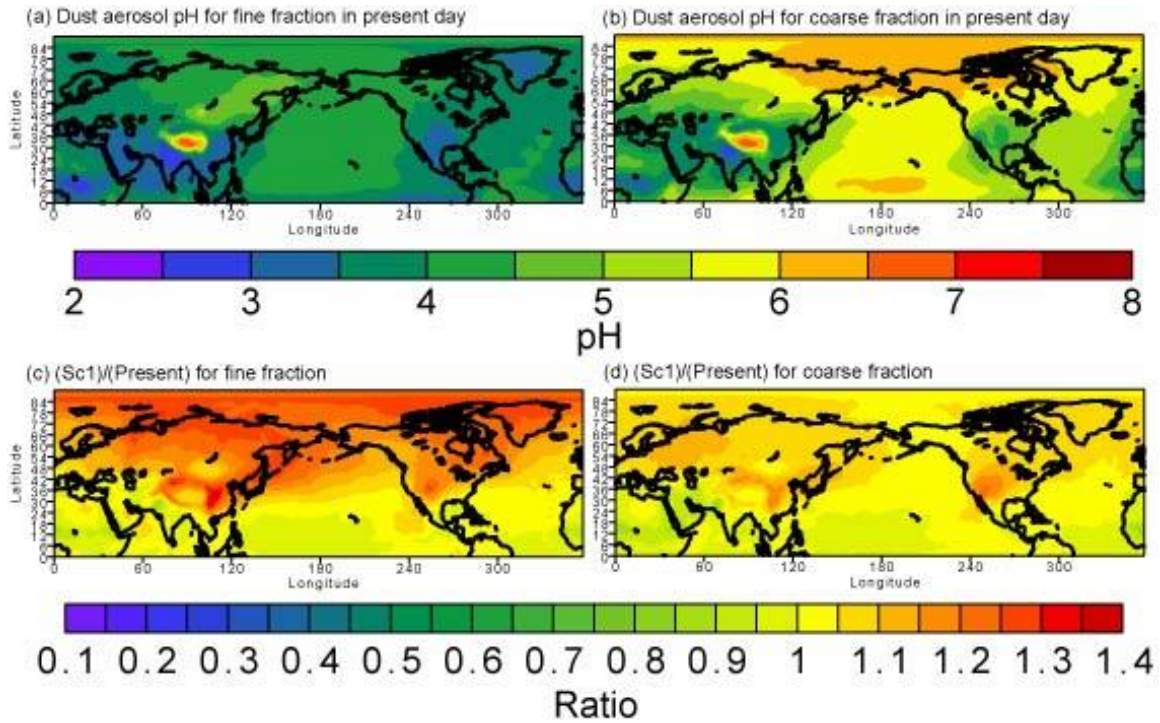

Figure S2. Spatial distribution of vertically and annually averaged dust pH for (a) fine (radius:  $<1.25 \mu\text{m}$ ) and (b) coarse fraction (radius:  $1.25\text{--}10 \mu\text{m}$ ) for the present day and the ratio of (Scenario 1)/(Present) for (c) fine and (d) coarse fraction.
